# Supplementary material for: Detectable Duration of Viable SARS-CoV-2, Total and Subgenomic SARS-CoV-2 RNA in Noncritically Ill COVID-19 Patients: a Prospective Cohort Study
Source: PubMed Central journal article supplement (PMC9241878; doi:10.1128/spectrum.00503-22), 2022-05-23
Supplement: spectrum.00503-22-s001.pdf [file spectrum.00503-22-s001.pdf]

Supplementary figure

1  
2  
3

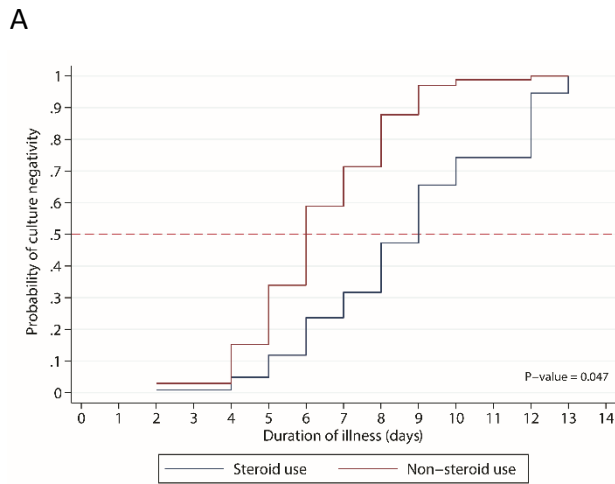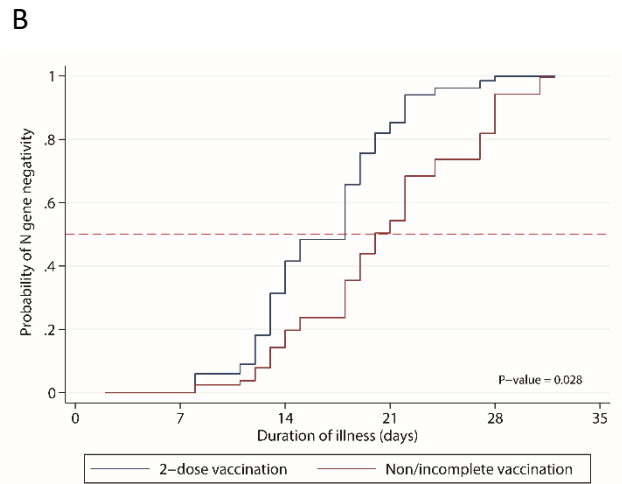

4  
5

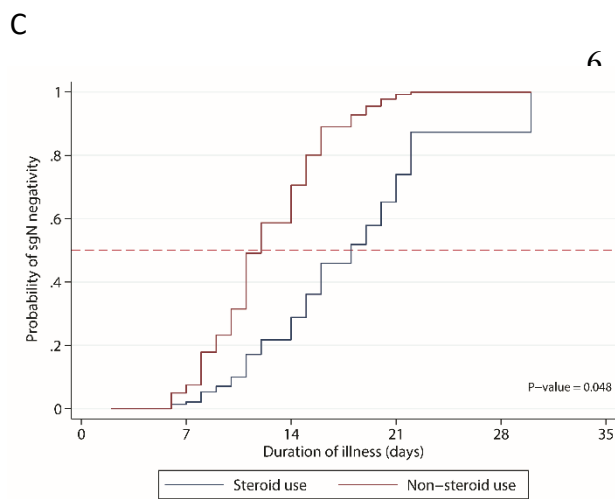

6

19 **Supplementary Figure 1**

20 Time to the negativity of SARS-CoV-2 shedding; time to viral culture negativity according to  
21 steroid use (A); time to N gene negativity according to receipt of 2-dose vaccination (B); and  
22 time to N gene subgenomic RNA negativity according to steroid use (C).  
23

24

**Supplementary Tables**

25

26 **Table 1.** Primer-probe sequences designed for the amplification of SARS-CoV-2 sgRNAs.

| <b>Primer name</b> | <b>Sequences 5'-3'</b>       |
|--------------------|------------------------------|
| Sub_F              | CAAACCAACCAACTTTCGATCTCTTGTA |
| TRSB-S_R           | TACCATTGGTCCCAGAGACATG       |
| TRSB-S_probe (FAM) | CCCTGACAAAGTTTTTCAGATCC      |
| TRSB-N_R           | AATTGGAACGCCTTGTCCTCGAG      |
| TRSB-N_probe (HEX) | GCTCTCACTCAACATGGCAA         |

27

28 **Table 2.** Details of patient characteristics and results of SARS-CoV-2 detection and virus strains

29

| Patient | Vaccine | Pneumonia | Favipiravir | Steroid | Oxygen | Strain          | Detection methods | Day of illness |   |   |   |   |   |   |   |   |   |    |    |    |    |    |    |    |    |    |    |    |    |    |    |    |    |    |    |    |    |    |    |    |    |    |   |   |   |   |   |   |
|---------|---------|-----------|-------------|---------|--------|-----------------|-------------------|----------------|---|---|---|---|---|---|---|---|---|----|----|----|----|----|----|----|----|----|----|----|----|----|----|----|----|----|----|----|----|----|----|----|----|----|---|---|---|---|---|---|
|         |         |           |             |         |        |                 |                   | 0              | 1 | 2 | 3 | 4 | 5 | 6 | 7 | 8 | 9 | 10 | 11 | 12 | 13 | 14 | 15 | 16 | 17 | 18 | 19 | 20 | 21 | 22 | 23 | 24 | 25 | 26 | 27 | 28 | 29 | 30 | 31 | 32 | 33 | 34 |   |   |   |   |   |   |
| 1       | N       | Y         | Y           | N       | N      | D614G (WT)      | Virus culture     | -              | - | - | - | - | - | - | - | - | - | -  | -  | -  | -  | -  | -  | -  | -  | -  | -  | -  | -  | -  | -  | -  | -  | -  | -  | -  | -  | -  | -  | -  | -  |    |   |   |   |   |   |   |
|         |         |           |             |         |        |                 | sgS RT-PCR        | +              | + | + | + | + | + | + | + | + | + | +  | +  | +  | +  | +  | +  | +  | +  | +  | +  | +  | +  | +  | +  | +  | +  | +  | +  | +  | +  | +  | +  | +  | +  | +  | + | + | + |   |   |   |
|         |         |           |             |         |        |                 | sgN RT-PCR        | +              | + | + | + | + | + | + | + | + | + | +  | +  | +  | +  | +  | +  | +  | +  | +  | +  | +  | +  | +  | +  | +  | +  | +  | +  | +  | +  | +  | +  | +  | +  | +  | + | + | + |   |   |   |
|         |         |           |             |         |        |                 | RT-PCR            | +              | + | + | + | + | + | + | + | + | + | +  | +  | +  | +  | +  | +  | +  | +  | +  | +  | +  | +  | +  | +  | +  | +  | +  | +  | +  | +  | +  | +  | +  | +  | +  | + | + | + | + |   |   |
| 2       | N       | N         | N           | N       | N      | D614G (WT)      | Virus culture     | -              | - | - | - | - | - | - | - | - | - | -  | -  | -  | -  | -  | -  | -  | -  | -  | -  | -  | -  | -  | -  | -  | -  | -  | -  | -  | -  | -  | -  | -  | -  | -  |   |   |   |   |   |   |
|         |         |           |             |         |        |                 | sgS RT-PCR        | +              | + | + | + | + | + | + | + | + | + | +  | +  | +  | +  | +  | +  | +  | +  | +  | +  | +  | +  | +  | +  | +  | +  | +  | +  | +  | +  | +  | +  | +  | +  | +  | + | + | + |   |   |   |
|         |         |           |             |         |        |                 | sgN RT-PCR        | +              | + | + | + | + | + | + | + | + | + | +  | +  | +  | +  | +  | +  | +  | +  | +  | +  | +  | +  | +  | +  | +  | +  | +  | +  | +  | +  | +  | +  | +  | +  | +  | + | + | + | + |   |   |
|         |         |           |             |         |        |                 | RT-PCR            | +              | + | + | + | + | + | + | + | + | + | +  | +  | +  | +  | +  | +  | +  | +  | +  | +  | +  | +  | +  | +  | +  | +  | +  | +  | +  | +  | +  | +  | +  | +  | +  | + | + | + | + |   |   |
| 3       | N       | Y         | Y           | N       | N      | D614G (WT)      | Virus culture     | -              | - | - | - | - | - | - | - | - | - | -  | -  | -  | -  | -  | -  | -  | -  | -  | -  | -  | -  | -  | -  | -  | -  | -  | -  | -  | -  | -  | -  | -  | -  | -  |   |   |   |   |   |   |
|         |         |           |             |         |        |                 | sgS RT-PCR        | +              | + | + | + | + | + | + | + | + | + | +  | +  | +  | +  | +  | +  | +  | +  | +  | +  | +  | +  | +  | +  | +  | +  | +  | +  | +  | +  | +  | +  | +  | +  | +  | + | + | + | + |   |   |
|         |         |           |             |         |        |                 | sgN RT-PCR        | +              | + | + | + | + | + | + | + | + | + | +  | +  | +  | +  | +  | +  | +  | +  | +  | +  | +  | +  | +  | +  | +  | +  | +  | +  | +  | +  | +  | +  | +  | +  | +  | + | + | + | + | + |   |
|         |         |           |             |         |        |                 | RT-PCR            | +              | + | + | + | + | + | + | + | + | + | +  | +  | +  | +  | +  | +  | +  | +  | +  | +  | +  | +  | +  | +  | +  | +  | +  | +  | +  | +  | +  | +  | +  | +  | +  | + | + | + | + | + |   |
| 4       | N       | N         | Y           | N       | N      | D614G (WT)      | Virus culture     | -              | - | - | - | - | - | - | - | - | - | -  | -  | -  | -  | -  | -  | -  | -  | -  | -  | -  | -  | -  | -  | -  | -  | -  | -  | -  | -  | -  | -  | -  | -  | -  | - | - |   |   |   |   |
|         |         |           |             |         |        |                 | sgS RT-PCR        | +              | + | + | + | + | + | + | + | + | + | +  | +  | +  | +  | +  | +  | +  | +  | +  | +  | +  | +  | +  | +  | +  | +  | +  | +  | +  | +  | +  | +  | +  | +  | +  | + | + | + | + | + |   |
|         |         |           |             |         |        |                 | sgN RT-PCR        | +              | + | + | + | + | + | + | + | + | + | +  | +  | +  | +  | +  | +  | +  | +  | +  | +  | +  | +  | +  | +  | +  | +  | +  | +  | +  | +  | +  | +  | +  | +  | +  | + | + | + | + | + | + |
|         |         |           |             |         |        |                 | RT-PCR            | +              | + | + | + | + | + | + | + | + | + | +  | +  | +  | +  | +  | +  | +  | +  | +  | +  | +  | +  | +  | +  | +  | +  | +  | +  | +  | +  | +  | +  | +  | +  | +  | + | + | + | + | + | + |
| 5       | N       | Y         | Y           | N       | N      | Alpha (B.1.1.7) | Virus culture     | -              | - | - | - | - | - | - | - | - | - | -  | -  | -  | -  | -  | -  | -  | -  | -  | -  | -  | -  | -  | -  | -  | -  | -  | -  | -  | -  | -  | -  | -  | -  | -  | - | - |   |   |   |   |
|         |         |           |             |         |        |                 | sgS RT-PCR        | +              | + | + | + | + | + | + | + | + | + | +  | +  | +  | +  | +  | +  | +  | +  | +  | +  | +  | +  | +  | +  | +  | +  | +  | +  | +  | +  | +  | +  | +  | +  | +  | + | + | + | + | + |   |
|         |         |           |             |         |        |                 | sgN RT-PCR        | +              | + | + | + | + | + | + | + | + | + | +  | +  | +  | +  | +  | +  | +  | +  | +  | +  | +  | +  | +  | +  | +  | +  | +  | +  | +  | +  | +  | +  | +  | +  | +  | + | + | + | + | + | + |





|    |   |   |   |   |   |                      |               |   |   |   |   |   |   |   |   |   |   |   |   |   |   |   |   |   |   |   |   |   |   |
|----|---|---|---|---|---|----------------------|---------------|---|---|---|---|---|---|---|---|---|---|---|---|---|---|---|---|---|---|---|---|---|---|
| 18 | N | N | N | N | N | Alpha<br>(B.1.1.7)   | Virus culture | - | - | - | - | - | - | - | - | - | - | - | - | - | - | - | - | - |   |   |   |   |   |
|    |   |   |   |   |   |                      | sgS RT-PCR    | + | + | + | + | - | - | - | - | - | - | - | - | - | - | - | - | - | - | - | - |   |   |
|    |   |   |   |   |   |                      | sgN RT-PCR    | + | + | + | + | + | - | - | - | + | - | + | - | - | - | - | - | - | - | - | - | - |   |
|    |   |   |   |   |   |                      | RT-PCR        | + | + | + | + | + | + | + | + | + | + | + | + | + | + | + | + | + | + | + | + | - |   |
| 19 | N | N | N | N | N | Alpha<br>(B.1.1.7)   | Virus culture | - | - | - | - | - | - | - | - | - | - | - | - | - | - | - | - | - |   |   |   |   |   |
|    |   |   |   |   |   |                      | sgS RT-PCR    | + | + | + | + | - | - | - | - | - | - | - | - | - | - | - | - | - | - | - | - |   |   |
|    |   |   |   |   |   |                      | sgN RT-PCR    | + | + | + | + | - | - | - | - | - | - | - | + | - | - | - | - | - | - | - | - | - |   |
|    |   |   |   |   |   |                      | RT-PCR        | + | + | + | + | + | + | + | + | + | + | + | + | + | + | + | + | + | + | + | + | - |   |
| 20 | N | N | N | N | N | Delta<br>(B.1.617.2) | Virus culture | - | - | - | - | - | - | - | - | - | - | - | - | - | - | - | - | - | - |   |   |   |   |
|    |   |   |   |   |   |                      | sgS RT-PCR    | + | + | + | + | - | - | - | - | - | - | - | - | - | - | - | - | - | - | - | - | - |   |
|    |   |   |   |   |   |                      | sgN RT-PCR    | + | + | + | + | - | - | - | - | - | - | - | - | - | - | - | - | - | - | - | - | - |   |
|    |   |   |   |   |   |                      | RT-PCR        | + | + | + | + | + | + | + | + | + | + | + | + | + | + | + | + | + | + | + | + | - |   |
| 21 | Y | N | Y | N | N | Delta<br>(B.1.617.2) | Virus culture | - | - | - | - | - | - | - | - | - | - | - | - | - | - | - | - | - | - |   |   |   |   |
|    |   |   |   |   |   |                      | sgS RT-PCR    | + | + | + | + | - | - | - | - | - | - | - | - | - | - | - | - | - | - | - | - | - |   |
|    |   |   |   |   |   |                      | sgN RT-PCR    | + | + | + | + | - | - | - | - | - | - | - | - | - | - | - | - | - | - | - | - | - |   |
|    |   |   |   |   |   |                      | RT-PCR        | + | + | + | + | - | - | - | - | - | - | - | - | - | - | - | - | - | - | - | - | - | - |
| 22 | Y | N | N | N | N | Delta<br>(B.1.617.2) | Virus culture | - | - | - | - | - | - | - | - | - | - | - | - | - | - | - | - | - | - | - |   |   |   |
|    |   |   |   |   |   |                      | sgS RT-PCR    | + | + | + | + | - | - | - | - | - | - | - | - | - | - | - | - | - | - | - | - | - |   |
|    |   |   |   |   |   |                      | sgN RT-PCR    | + | + | + | + | - | - | - | - | - | - | - | - | - | - | - | - | - | - | - | - | - | - |
|    |   |   |   |   |   |                      | RT-PCR        | + | + | + | + | + | + | + | + | + | + | + | + | + | + | + | + | + | + | + | + | - | - |
| 23 | Y | Y | Y | Y | Y | Delta<br>(B.1.617.2) | Virus culture | + | + | + | + | - | - | - | - | - | - | - | - | - | - | - | - | - | - | - | - |   |   |
|    |   |   |   |   |   |                      | sgS RT-PCR    | + | + | + | + | + | + | + | + | + | + | + | + | + | + | + | + | + | + | + | + | + | - |
|    |   |   |   |   |   |                      | sgN RT-PCR    | + | + | + | + | + | + | + | + | + | + | + | + | + | + | + | + | + | + | + | + | + | - |
|    |   |   |   |   |   |                      | RT-PCR        | + | + | + | + | + | + | + | + | + | + | + | + | + | + | + | + | + | + | + | + | + | - |
| 24 | N | Y | Y | N | N | Delta<br>(B.1.617.2) | Virus culture | + | + | + | + | - | - | - | - | - | - | - | - | - | - | - | - | - | - | - | - |   |   |
|    |   |   |   |   |   |                      | sgS RT-PCR    | + | + | + | + | - | - | - | - | - | - | - | - | - | - | - | - | - | - | - | - | - | - |
|    |   |   |   |   |   |                      | sgN RT-PCR    | + | + | + | + | + | + | + | + | + | + | + | + | + | + | + | + | + | + | + | + | + | - |
|    |   |   |   |   |   |                      | RT-PCR        | + | + | + | + | + | + | + | + | + | + | + | + | + | + | + | + | + | + | + | + | + | - |
